# Supplementary material for: Long noncoding RNA AFAP1-AS1 acts as a competing endogenous RNA of miR-423-5p to facilitate nasopharyngeal carcinoma metastasis through regulating the Rho/Rac pathway
Source: Springer Nature journal article supplement (doi:10.1186/s13046-018-0918-9), 2018-10-16
Supplement: MOESM1 [file 16204132]

**Supplemental Table 1. Primers used for qRT-PCR or construction and siRNA**

| <b>Primers used for qRT-PCR</b> |                         |
|---------------------------------|-------------------------|
| <b>Symbol</b>                   | <b>Sequence (5'-3')</b> |
| GAPDH_L                         | CAACGGATTGGTCGTATTGG    |
| GAPDH_R                         | TGACGGTGCCATGGAATTT     |
| RAC1_L                          | TCCGTGCAAAGTGGTATCCT    |
| RAC1_R                          | TCGCTTCGTCAAACACTGTC    |
| RAC2_L                          | TACATCCCCACCGTGTGTTGA   |
| RAC2_R                          | TCATAAGAGGCTGGGCTGAC    |
| RAB10_L                         | AGACCCCTGTAAAAGAGCCC    |
| RAB10_R                         | AGTCAGCAAGCAGTCACAGA    |
| RAB11A_L                        | CTACGTATCTCAGGGCAGT     |
| RAB11A_R                        | ACTGCACCTTTGGCTTGTTT    |
| RAB11B_L                        | TTCAAAGTGGTGCTCATCGG    |
| RAB11B_R                        | TCATAGGTCAGGTGCTTGCC    |
| RHOA_L                          | CACAGTGCTCTTTCTCCTCA    |
| RHOA_R                          | AGTTTAGTCAGCTGGAGAGAAG  |
| RHOC_L                          | GCAATCCGAAAGAAGCTGGT    |
| RHOC_R                          | TCCACCTCAATGTCCGCAAT    |
| LASP1_L                         | GAAGAAGCCCTACTGCAACG    |
| LASP1_R                         | TTGATTCTCTGGAGCTCGGG    |
| PFN1_L                          | CCAAGACTGACAAGACGCTAG   |
| PFN1_R                          | AAGGGGTATGGGGTAATGGC    |
| FOSL2_L                         | GCCAGCAGAAATCCGGG       |
| FOSL2_R                         | GGGTTGGACATGGAGGTGAT    |
| AFAP1-AS1_L                     | AATGGTGGTAGGAGGGAGGA    |
| AFAP1-AS1_R                     | CACACAGGGGAATGAAGAGG    |

**The wild type and mutant sequences for vectors construction**

| <b>Symbol</b>         | <b>Sequence (5'-3')</b>                                     |
|-----------------------|-------------------------------------------------------------|
| 423-5p-AFAP1-AS1-WT_L | CTAGTTTTCCAGGTGTGAGCTGCTCCTCTCCCCATCTGCCCTCTCAAAGAAACAA     |
| 423-5p-AFAP1-AS1-WT_R | AGCTTTGTTTCTTTGAGGAGGGGCAGATGGGGGAGAGGAGCAGCTCACACCTGGAAAA  |
| 423-5p-AFAP1-AS1-MT_L | CTAGTTTTCCAGGTGTGAGCTGCTCCTCTCCCCACTCAAAGAAACAA             |
| 423-5p-AFAP1-AS1-MT_R | AGCTTTGTTTCTTTGAGTGGGGGAGAGGAGCAGCTCACACCTGGAAAA            |
| 423-5p-FOSL2-WT_L     | CTAGTGCTGGACCTTCCCCAGATGCTGCCAGGCAGCCCCTCCCCAAGCCTCAAAGAA   |
| 423-5p-FOSL2-WT_R     | AGCTTTCTTTGAGGCTTGGGGAGGGGCTGCCTGGCAGCATCTGGGGAAAGTCCAGGCA  |
| 423-5p-FOSL2-MT_L     | CTAGTGCTGGACCTTCCCCAGATGCTGCCAGGCA CTAGGCACCCAAAGCCTCAAAGAA |
| 423-5p-FOSL2-MT_R     | AGCTTTCTTTGAGGCTTGGGTGCCTAGTGCCTGGCAGCATCTGGGGAAAGTCCAGGCA  |
| pAP1-PFN1-WT_L        | CCGCGGCTGAGTCACCCGCGGTGAGTCACCCGCGGTGAGTCACA                |
| pAP1-PFN1-WT_R        | GATCTGTGACTCAGCCGCGGTGACTCAGCCGCGGTGACTCAGCCGCGGTGAC        |
| pAP1-PFN1-MT_L        | CTGCGGCCTGGGACCTGCGGCCTGGGACCTGCGGCCTGGGACCA                |
| pAP1-PFN1-MT_R        | GATCTGGTCCCAGGCCGAGGTCCCAGGCCGCGAGTCCCAGGCCGAGGTAC          |
| 423-5p-RAC1-WT_L      | CTAGTAGAAAATGCTGCTGTTGTAATGTCTCAGCCCTCGTTCTTGGTCTGTCCA      |
| 423-5p-RAC1-WT_R      | AGCTTGGACAGGACCAAGAACGAGGGGCTGAGACATTTACAACAGCAGGCATTTTCTA  |
| 423-5p-RAC1-MT_L      | CTAGTAGAAAATGCTGCTGTTGTAATGTCTCACAATGTGTTCTTGGTCTGTCCA      |
| 423-5p-RAC1-MT_R      | AGCTTGGACAGGACCAAGAACACATTTGTGAGACATTTACAACAGCAGGCATTTTCTA  |
| 423-5p-RAB11B-WT_L    | CTAGTCCGCCCGCCCCGCCACGGTATCCTCTGGCCCCCTCCCTGCTGTCCCTCTGTGA  |
| 423-5p-RAB11B-WT_R    | AGCTTCACAGAGGGACAGCAGGGAGGGGCCAGAGGATACCGTGGCGGGGGCGGGCGGA  |
| 423-5p-RAB11B-MT_L    | CTAGTCCGCCCGCCCCGCCACGGTATCCTCTGAATATGACCTGCTGTCCCTCTGTGA   |
| 423-5p-RAB11B-MT_R    | AGCTTCACAGAGGGACAGCAGGTATTCAGAGGATACCGTGGCGGGGGCGGGCGGA     |
| 423-5p-LASP1-WT_L     | CTAGTGTGGGCTCACCTGCCCTCTGTTCTCTCCCCTCACATCCTCTGCCAGCTA      |
| 423-5p-LASP1-WT_R     | AGCTTAGCTGGGCAGGAGGATGTGAGGGGAGAGAACAGAGGGGCAGGTGAGGCCACACA |
| 423-5p-LASP1-MT_L     | CTAGTGTGGGCTCACCTGCCCTCTGTTCTCTTTAAGTCCATCCTCTGCCAGCTA      |
| 423-5p-LASP1-MT_R     | AGCTTAGCTGGGCAGGAGGATGGACTTAAAGAGAACAGAGGGGCAGGTGAGGCCACACA |

**The primers for the AFAP1-AS1 overexpression vectors**

| <b>Symbol</b> | <b>Sequence (5'-3')</b>                         |
|---------------|-------------------------------------------------|
| AFAP1-AS1_L   | GCTGGCTAGCGTTTAAACTTAAGCTTCAGTGCCTCCCTCGCTCAAT  |
| AFAP1-AS1_R   | TGCAGAATCCACCACACTGGATCCTTTGTTTGTGTTTATTTTAAATG |

**siRNAs**

| <b>Symbol</b> | <b>Sequence (5'-3')</b>  |
|---------------|--------------------------|
| siAFAP1-AS1   | CCTATCTGGTCAACACGTATT    |
| siFOSL2       | AAGACCUGGCGUGAUCAAGACCAU |
