# Supplementary material for: Long noncoding RNA AFAP1-AS1 acts as a competing endogenous RNA of miR-423-5p to facilitate nasopharyngeal carcinoma metastasis through regulating the Rho/Rac pathway
Source: Springer Nature journal article supplement (doi:10.1186/s13046-018-0918-9), 2018-10-16

# Supplementary Figure S1

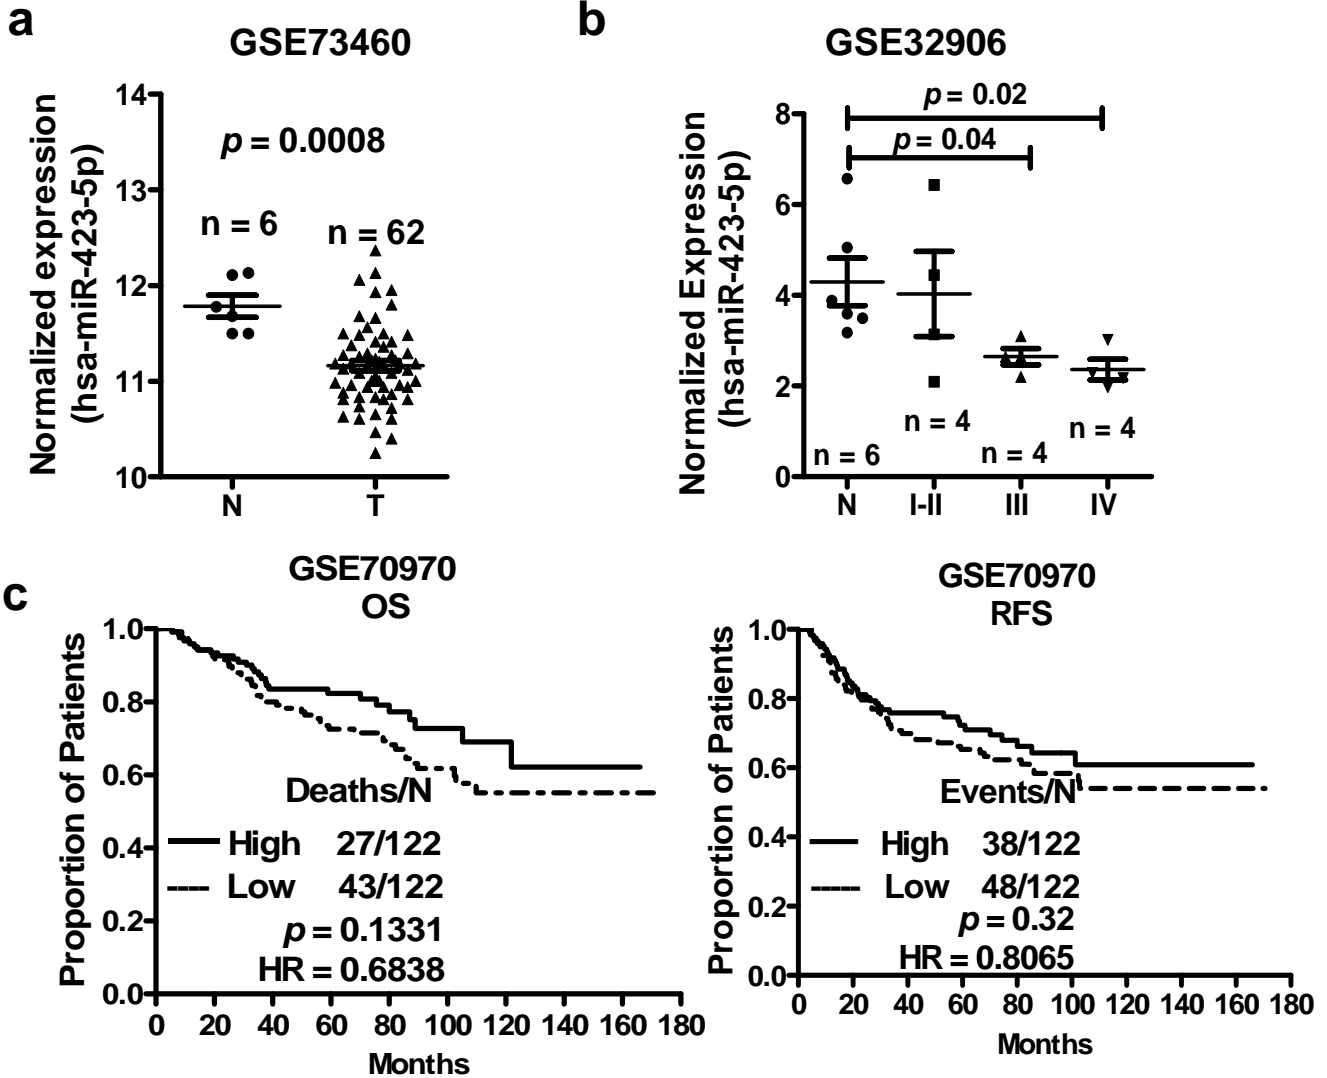

# Supplementary Figure S2

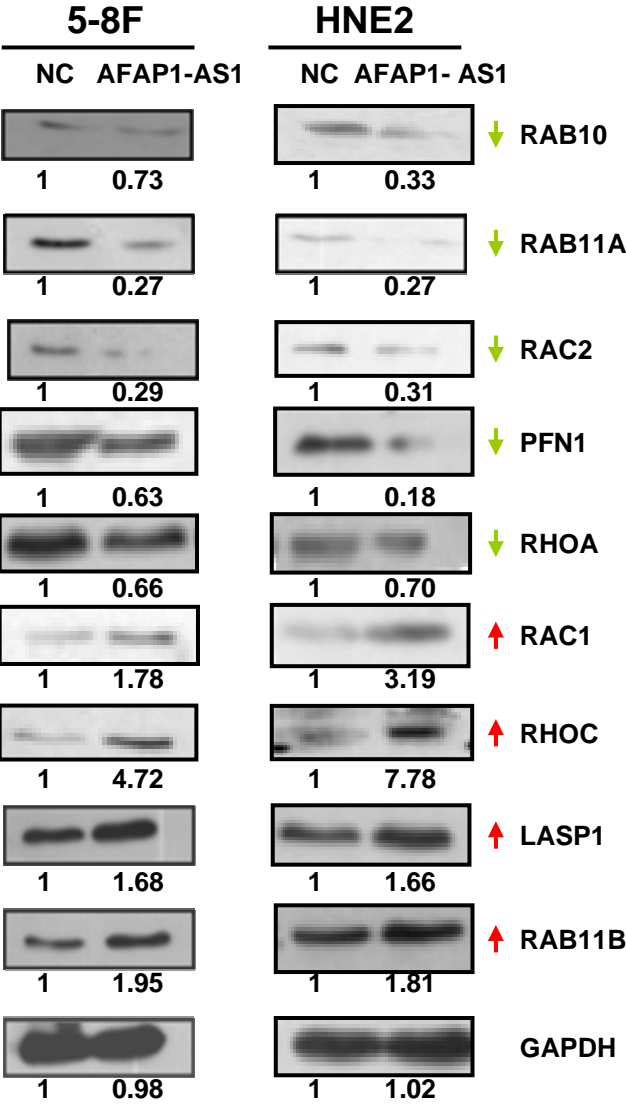

# Supplementary Figure S3

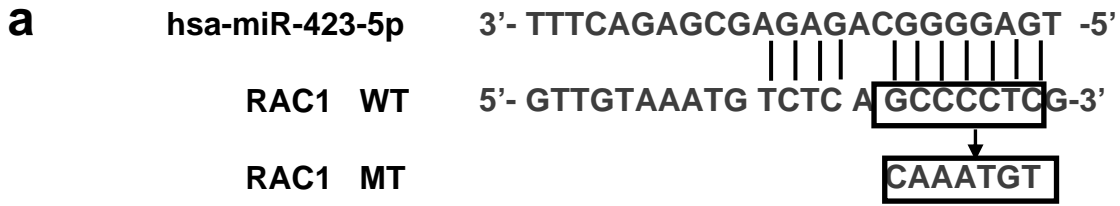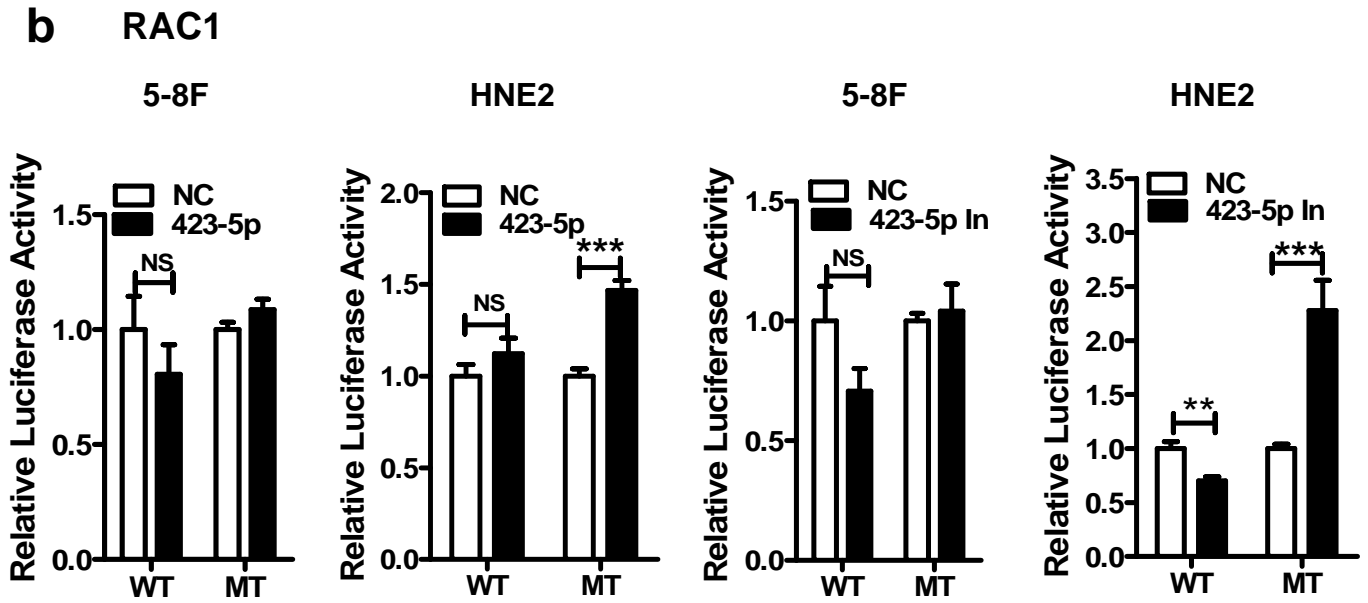

# Supplementary Figure S4

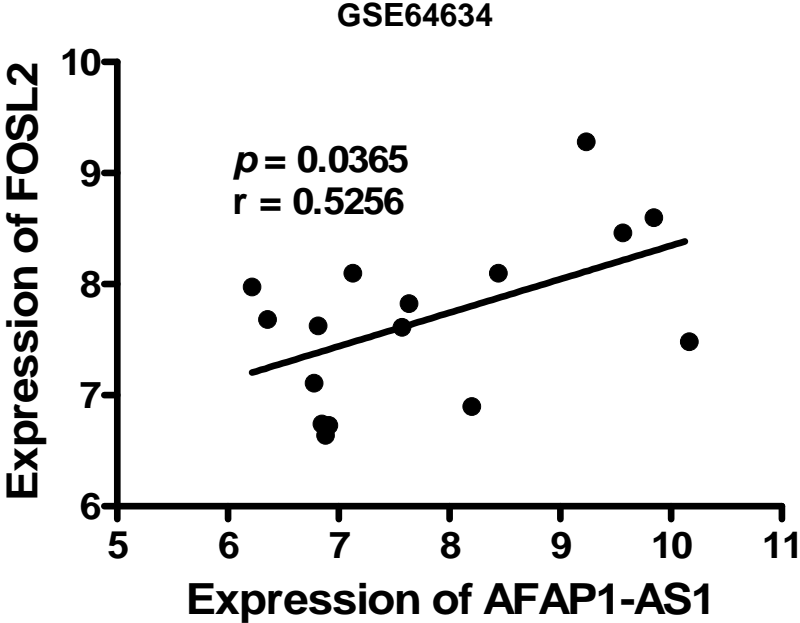

# Supplementary Figure S5

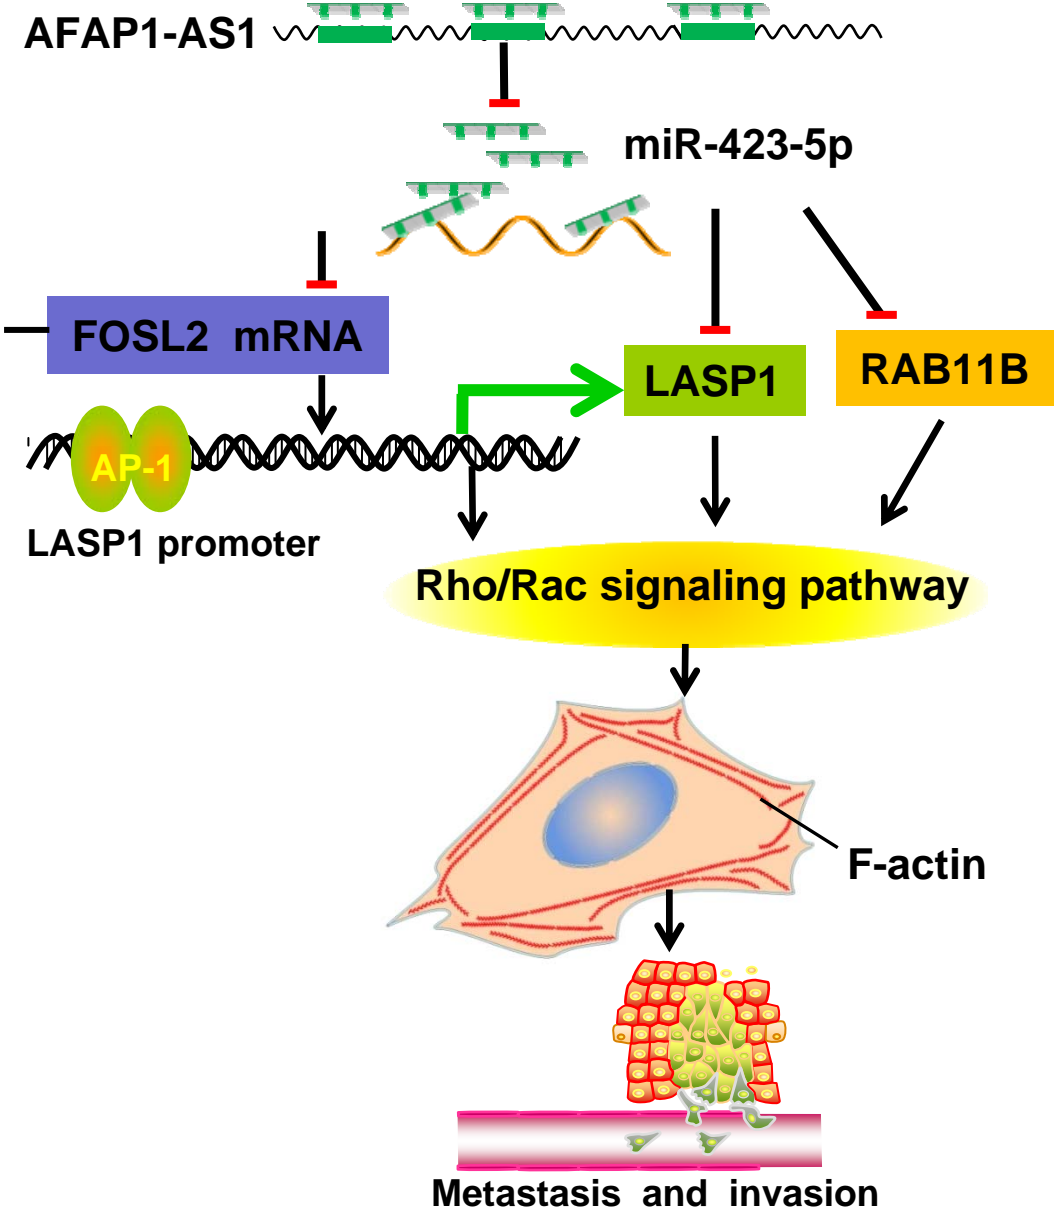

Supplement: MOESM2 [file 16204132]
